# Supplementary material for: SECOM: A Novel Hash Seed and Community Detection Based-Approach for Genome-Scale Protein Domain Identification
Source: PubMed Central journal article supplement (PMC3386278; doi:10.1371/journal.pone.0039475), 2012-06-28

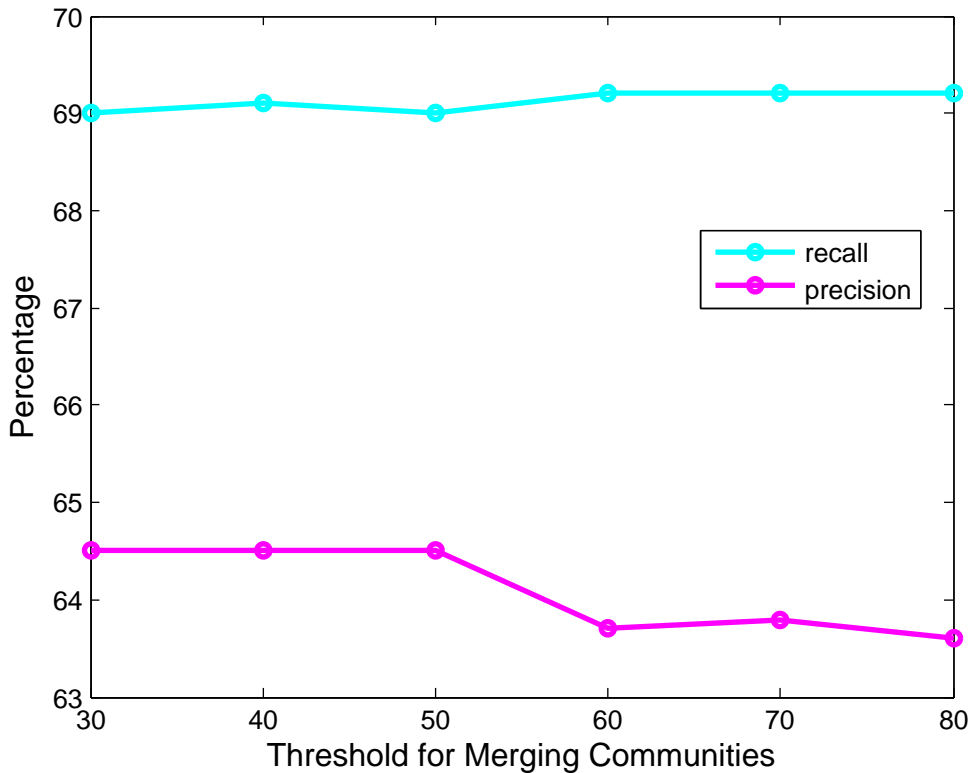

Supplement: pone.0039475.s008.pdf [file pone.0039475.s008.pdf]
