# Supplementary material for: SECOM: A Novel Hash Seed and Community Detection Based-Approach for Genome-Scale Protein Domain Identification
Source: PLoS One. 2012 Jun 28;7(6):e39475. doi: 10.1371/journal.pone.0039475 (PMC3386278; doi:10.1371/journal.pone.0039475)
Supplement: Table S1 — Overall performance of SECOM and DIVCLUS on the five aquatic proteomes. The revised recall, precision and F1 score values are given in percentiles. DIV denotes DIVCLUS and SEC denotes SECOM. (TEX) [file pone.0039475.s013.tex]

\documentclass[12pt]{article}
\usepackage{cases}
\usepackage{booktabs}
\usepackage{color}
\usepackage{threeparttable}
\usepackage{placeins}
\usepackage{float}

\usepackage{graphicx}
\usepackage{tabularx}

\usepackage{array}


\topmargin 0.0cm
\oddsidemargin 0.5cm
\evensidemargin 0.5cm
\textwidth 16cm
\textheight 21cm
\begin{document}

 \begin{flushleft} Table S1: Overall performance of SECOM and DIVCLUS on the five aquatic proteomes. The revised recall, precision and F1 score values are given in percentiles. DIV denotes DIVCLUS and SEC denotes SECOM.
 \end{flushleft}

\begin{table*}[htb]

\centering
\begin{threeparttable}
\begin{tabular}{l|cc|cc|cc|cc|cc|cc}
 \toprule
         Species   &\multicolumn{2}{c|}{Sponge}     & \multicolumn {2}{c|} {Coral}  & \multicolumn {2}{c|} {Hydra}
            &\multicolumn{2}{c|}{Urchin} &\multicolumn{2}{c|}{Anemone} &\multicolumn{2}{c}{\emph{Average}} \\\hline
         Method & DIV & SEC & DIV & SEC & DIV
            & SEC& DIV & SEC& DIV
            & SEC & DIV & SEC\\\hline
   $recall_{clu}$ &  61.6&	69.2&	12.0&	18.7&	66.7&	73.0&  	 94.0&   99.2&	2.8&	60.5&	47.4&	64.1\\
 $precision_{clu}$&  70.3&	63.8&	89.7&	65.0&	71.8&	65.0& 	 82.7&	 81.2&	95.5&	69.6&	82.0&   68.9\\
 $F1_{clu}$       &  65.8&	66.4&	21.2&	29.0&	69.2&	68.8&	 88.0&	 89.3&	5.4&	64.7&	60.1&	66.4\\
 $recall_{inClu}$   &  76.2&	76.7&	78.2&	88.3&	85.7&	90.5&	 84.3&	 99.2&	73.6&	85.7&	79.6&	 88.1\\
 $precision_{inClu}$&  99.7&	99.8&	100&	99.9&	99.9&	100&	 99.9&	 99.9&	100&	99.9&	99.9&	 99.9\\
  $F1_{inClu}$      &  86.4&	86.7&	87.8&	93.7&	92.3&	95.0&	 91.4&	 99.5&	84.8&	92.3&	88.6&	 93.6\\
  \bottomrule
\end{tabular}
\end{threeparttable}
\label{ActualFiveGenomes}
\end{table*}


\end{document} 
